# Supplementary material for: Scavenging mitochondrial hydrogen peroxide by peroxiredoxin 3 overexpression attenuates contractile dysfunction and muscle atrophy in a murine model of accelerated sarcopenia
Source: PubMed Central journal article supplement (PMC8920438; doi:10.1111/acel.13569), 2022-02-24
Supplement: ACEL-21-e13569-s001.pdf [file ACEL-21-e13569-s001.pdf]

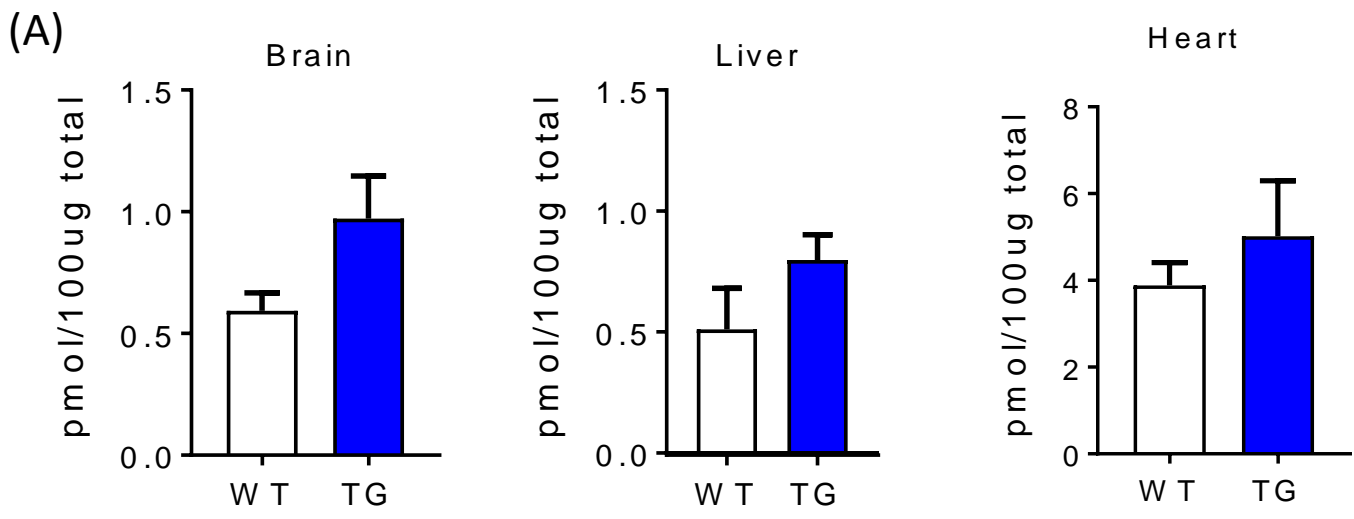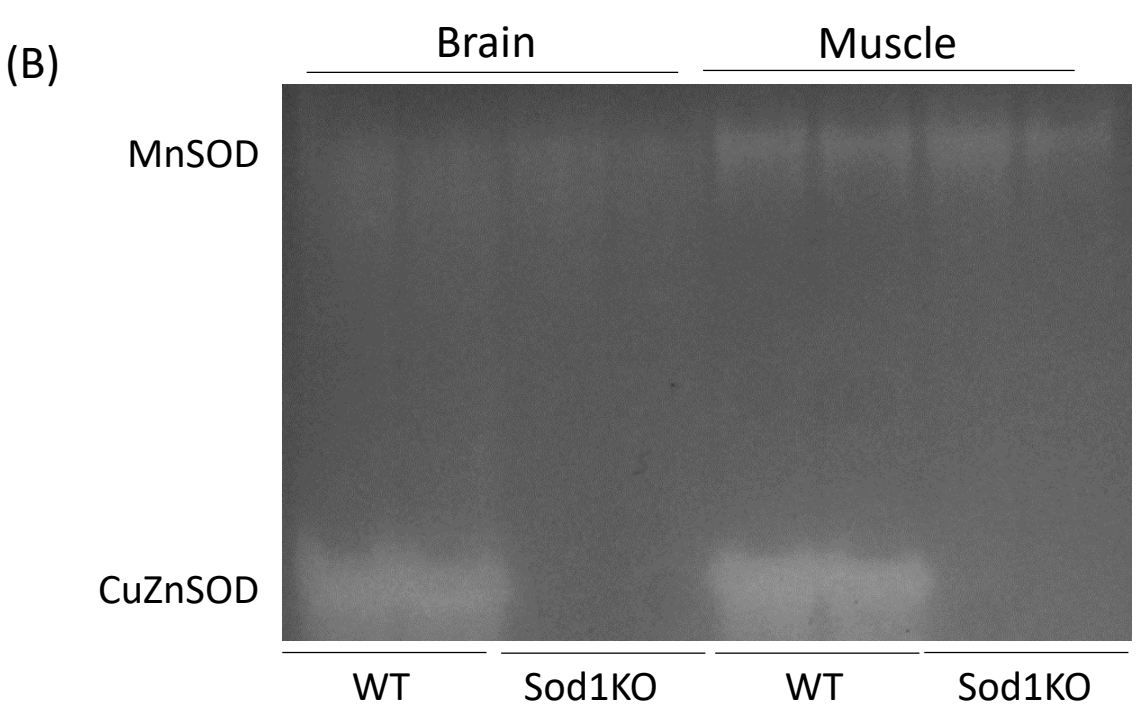

Figure S1

(A)

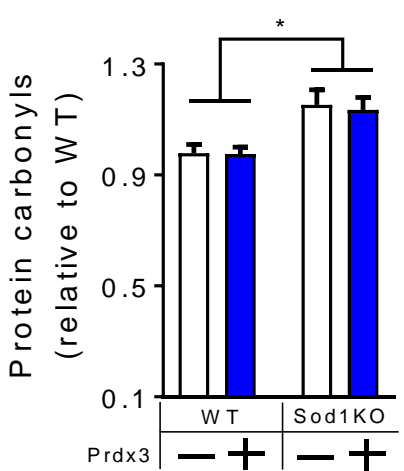

(B)

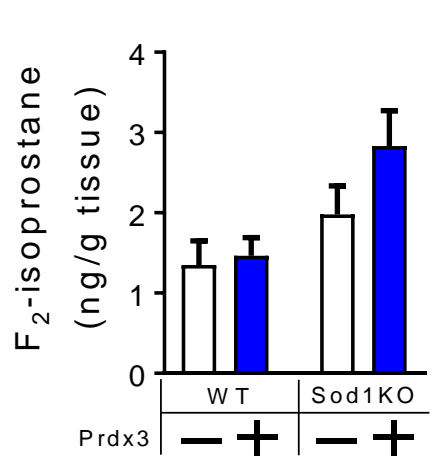

(D)

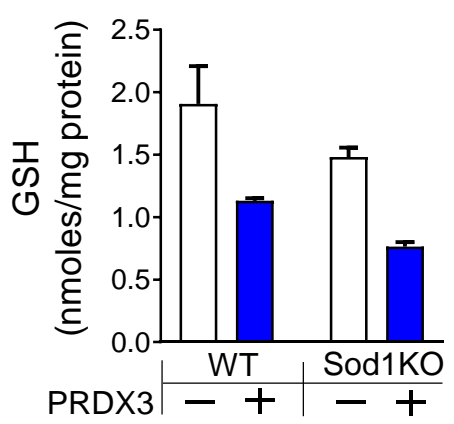

(E)

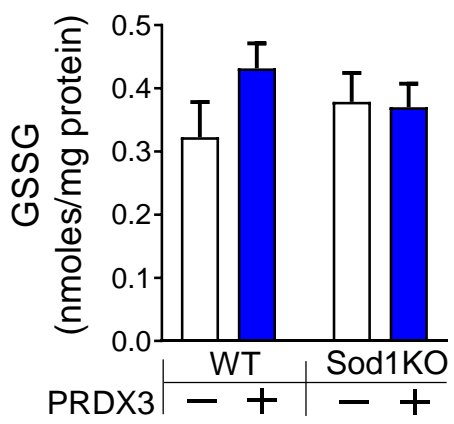

(F)

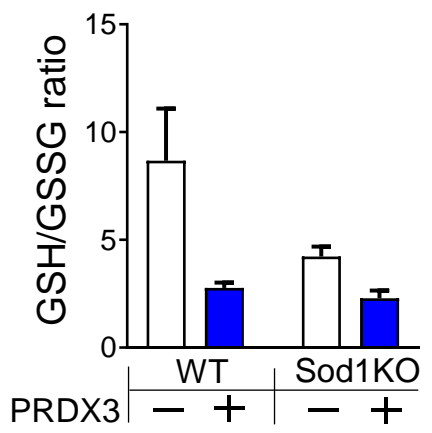

Figure S2

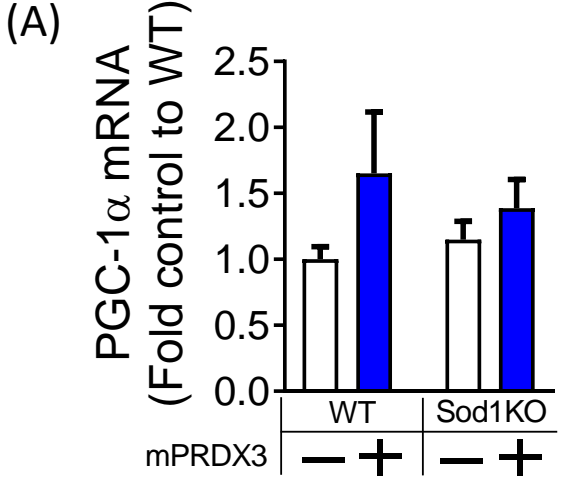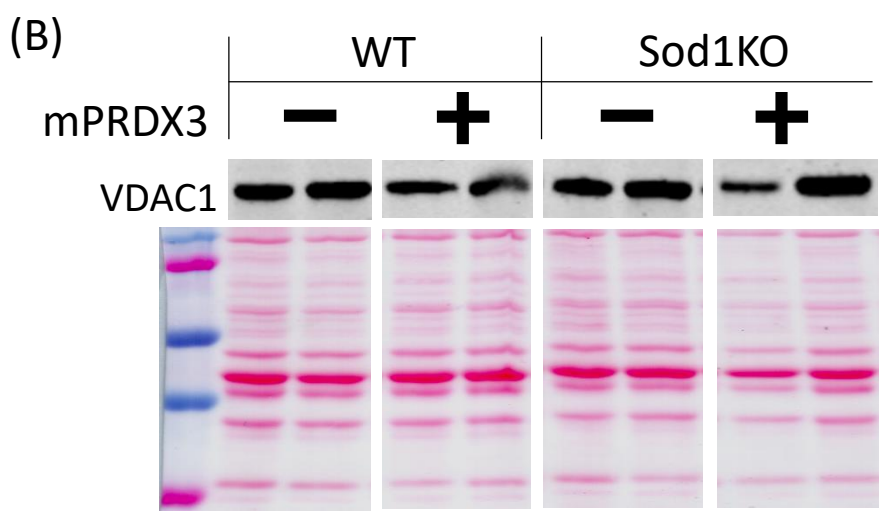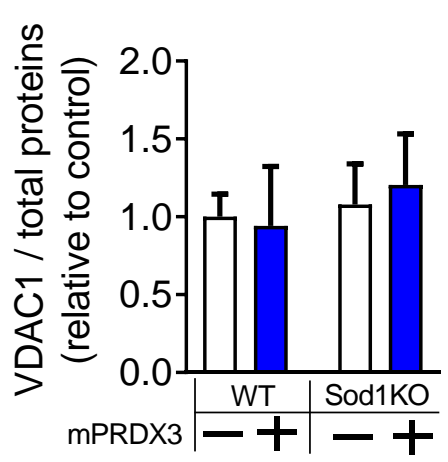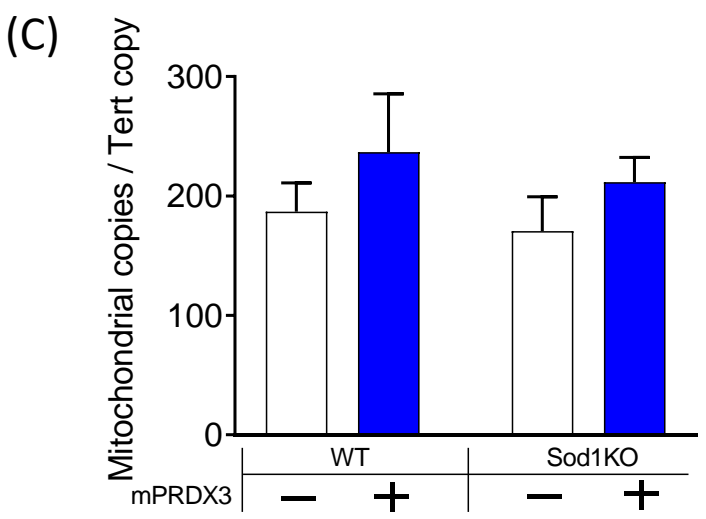

Figure S3

**(A) Expression of proteins in muscle**

| Gene name | NCBI Gene ID | WT         | WT-Prdx3Tg | <i>p-val</i> |
|-----------|--------------|------------|------------|--------------|
| Decr1     | 67460        | 0.33 ±0.06 | 0.46 ±0.07 | 0.047 *      |
| Eno1      | 13806        | 0.24 ±0.03 | 0.41 ±0.05 | 0.014 *      |
| Gpx4      | 625249       | 0.05 ±0.01 | 0.06 ±0.01 | 0.037 *      |
| Gstm1     | 14862        | 2.23 ±0.31 | 3.16 ±0.32 | 0.040 *      |
| HmgcL     | 15356        | 0.05 ±0.01 | 0.07 ±0.01 | 0.006 *      |
| Hspa5     | 14828        | 0.13 ±0.02 | 0.18 ±0.01 | 0.004 *      |
| Prdx3     | 11757        | 0.38 ±0.05 | 1.43 ±0.21 | 0.012 *      |
| Slc25a20  | 57279        | 0.09 ±0.02 | 0.14 ±0.03 | 0.036 *      |

**(B) Western Blots**

| Primary Antibodies | Company, Catalogue # | Ratio, incubation |
|--------------------|----------------------|-------------------|
| Prdx3              | Abcam, ab73349       | 1:1000, overnight |
| MuRF1              | SCBT, sc-398608      | 1:500, overnight  |
| MAFbx              | SCBT, sc-166806      | 1:1000, overnight |
| Pax7               | SCBT, sc-81975       | 1:1000, overnight |
| MyoD               | SCBT, sc-377460      | 1:1000, overnight |
| Myogenin           | SCBT, sc-52903       | 1:1000, overnight |
| Atkt-pan           | CST, 4691            | 1:1000, overnight |
| pAkt-Thr           | CST, 9275            | 1:1000, overnight |
| 4EBP1              | CST, 9644            | 1:1000, overnight |

**(C) qRT-PCR Primer Sequences**

| Gene Name  | Forward Primer            | Reverse Primer         |
|------------|---------------------------|------------------------|
| hPrdx3     | ACAGCCGTTGTCAATGGAGAG     | ACGTCGTGAAATTCGTTAGCTT |
| mPrdx3     | GCAGCTGCGGGAAGGTTGCT      | TGCTGGGTGACAGCAGGGGT   |
| PGC1a      | CAGACCTGACACAACGCGGACAG   | CCTGCGCAAGCTTCTCTGAGC  |
| AchR-a     | ACCTGGACCTATGACGGCTCT     | AGTTACTCAGGTCGGGCTGGT  |
| GADD45a    | AGACCGAAAGGATGGACACG      | GTACACGCCGACCGTAATG    |
| Runx1      | GATGGCACTCTGGTCACCG       | GCCGCTCGGAAAAGGACAA    |
| Sarcolipin | GAGGTGGAGAGACTGAGGTCCTTGG | GAAGCTCGGGGCACACAGCAG  |
| MuRF1      | ACCTGCTGGTGGAAAACATC      | AGGAGCAAGTAGGCACCTCA   |
| Atrogin1   | GCAGAGAGTCGGCAAGTC        | CAGGTCGGTGATCGTGAG     |
| Myogenin   | ACTCCCTTACGTCCATCGTG      | CAGGACAGCCCCTTAAA      |
| eMHC       | GACTCAGCCGACACCATGAG      | TTTTCCGACTTGCGGAGGAA   |
